# Supplementary material
Source: PubMed Central journal article supplement (PMC7610758)
Supplement: EMS123362-supplement-Supplementary_materials.pdf [file EMS123362-supplement-Supplementary_materials.pdf]

## Supplementary Materials for

### Rituximab-resistant splenic memory B cells and newly engaged naive B cells fuel relapses in patients with immune thrombocytopenia

Etienne Crickx, Pascal Chappert, Aurélien Sokal, Sandra Weller, Imane Azzaoui, Alexis Vandenberghe, Guillaume Bonnard, Geoffrey Rossi, Tatiana Fadeev, Sébastien Storck, Jehane Fadlallah, Véronique Meignin, Etienne Rivière, Sylvain Audia, Bertrand Godeau, Marc Michel, Jean-Claude Weill, Claude-Agnès Reynaud, Matthieu Mahévas\*

\*Corresponding author. Email: matthieu.mahevas@aphp.fr

Published 14 April 2021, *Sci. Transl. Med.* **13**, eabc3961 (2021)

DOI: 10.1126/scitranslmed.abc3961

#### The PDF file includes:

Fig. S1. Ki67 expression in splenic memory B cells and plasma cells.

Fig. S2. Germinal centers in RTX relapse patients.

Fig. S3. Splenic B cell repertoire in RTX-relapse patients.

Fig. S4. IgM sequences predominate in newly generated B cells and IgG sequences in RTX-resistant cells.

Fig. S5. V<sub>H</sub> segment mutation distribution in HD and patients with ITP.

Fig. S6. Circos plots showing clonal relationships among IgM and IgG B cell populations in RTX relapse patients.

Fig. S7. Detection of autoreactive clones using IgG anti-GPIIb/IIIa ELISPOT.

Fig. S8. GPIIb/IIIa-specific B cell repertoire.

Fig. S9. Top marker genes identified for each individual memory B cell cluster.

Fig. S10. Characterization of memory B cells in RTX-relapse patients.

Fig. S11. In vitro exposure to RTX induces a residual memory B cell-like phenotype in human splenic memory B cells.

Table S1. Patient characteristics.

Table S2. Immunoglobulin heavy chain sequencing.

Table S3. Mean standard deviation of V<sub>H</sub> mutation numbers in the first 100 clones.

Table S4. Identification of anti-GPIIb/IIIa-specific single B cells.

Table S5. scRNA-seq statistics.

Table S6. Antibodies and clones.

Table S7. Primers.

**Other Supplementary Material for this manuscript includes the following:**

(available at [stm.sciencemag.org/cgi/content/full/13/589/eabc3961/DC1](http://stm.sciencemag.org/cgi/content/full/13/589/eabc3961/DC1))

Data file S1 (Microsoft Excel format)

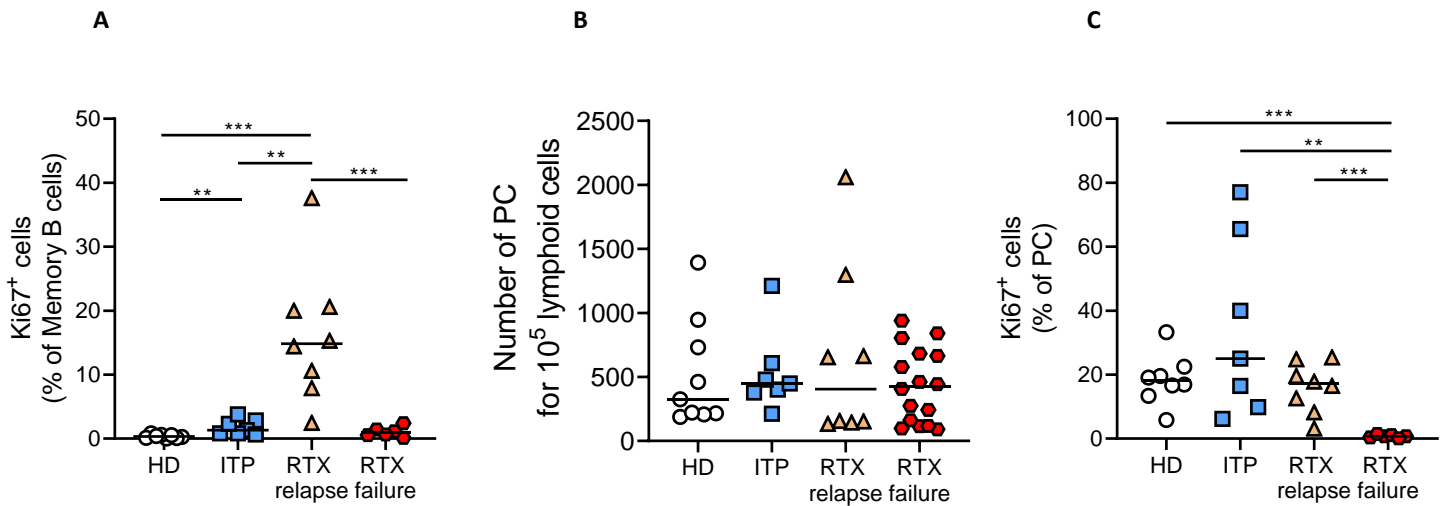

**Fig. S1. Ki67 expression in splenic memory B cells and plasma cells.**

Percentage of Ki67 expression on memory B cells (**A**), number of plasma cells (PC) for 10<sup>5</sup> lymphoid cells (**B**) and percentage of Ki67 expression and PC (**C**) in healthy donors (HD, white circles), patients with immune thrombocytopenia (ITP, blue squares), patients with relapse after RTX (RTX relapse, rose triangles) and patients with primary failure of RTX (RTX failure, red hexagons). Kruskal-Wallis and corrections for multiple comparisons were performed (\*\*\* $P < 0.001$ ; \*\* $P < 0.01$ , \* $P < 0.05$ ). Symbols indicate individual samples; horizontal bars represent median values.

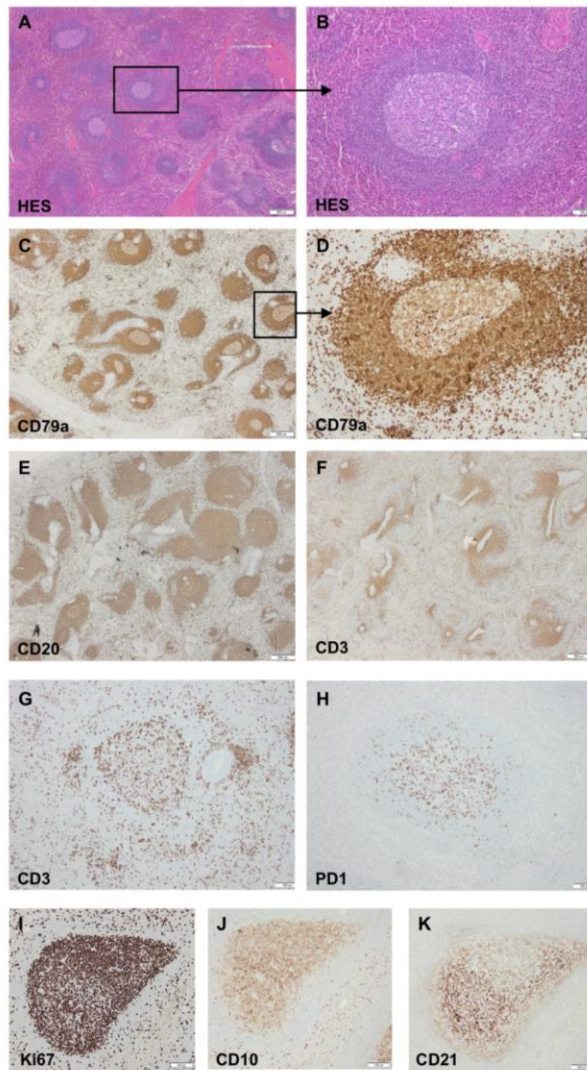

**Fig. S2. Germinal centers in RTX relapse patients.**

Representative spleen sections from patients with relapse after RTX (RTX relapse, n=2) stained with Hematoxylin Eosin Safran (HES) (**A-B**) and immunostained with CD79a (**C-D**), CD20 (**E**), CD3 (**F-G**), PD-1 (**H**), Ki67 (**I**), CD10 (**J**) and CD21 (**K**) to identify germinal center (GC) B cells ( $CD79a^{low}$ ,  $CD10^{+}$ ,  $Ki67^{+}$ ), T Cells ( $CD3^{+}$ ), T follicular helper ( $T_{FH}$ ) cells ( $PD-1^{+}$ ), and follicular dendritic cells ( $CD21^{+}$ ). (A, C, E and F) Scale bars: 500  $\mu$ m. (B, D, G-K) Scale bars: 100  $\mu$ m.

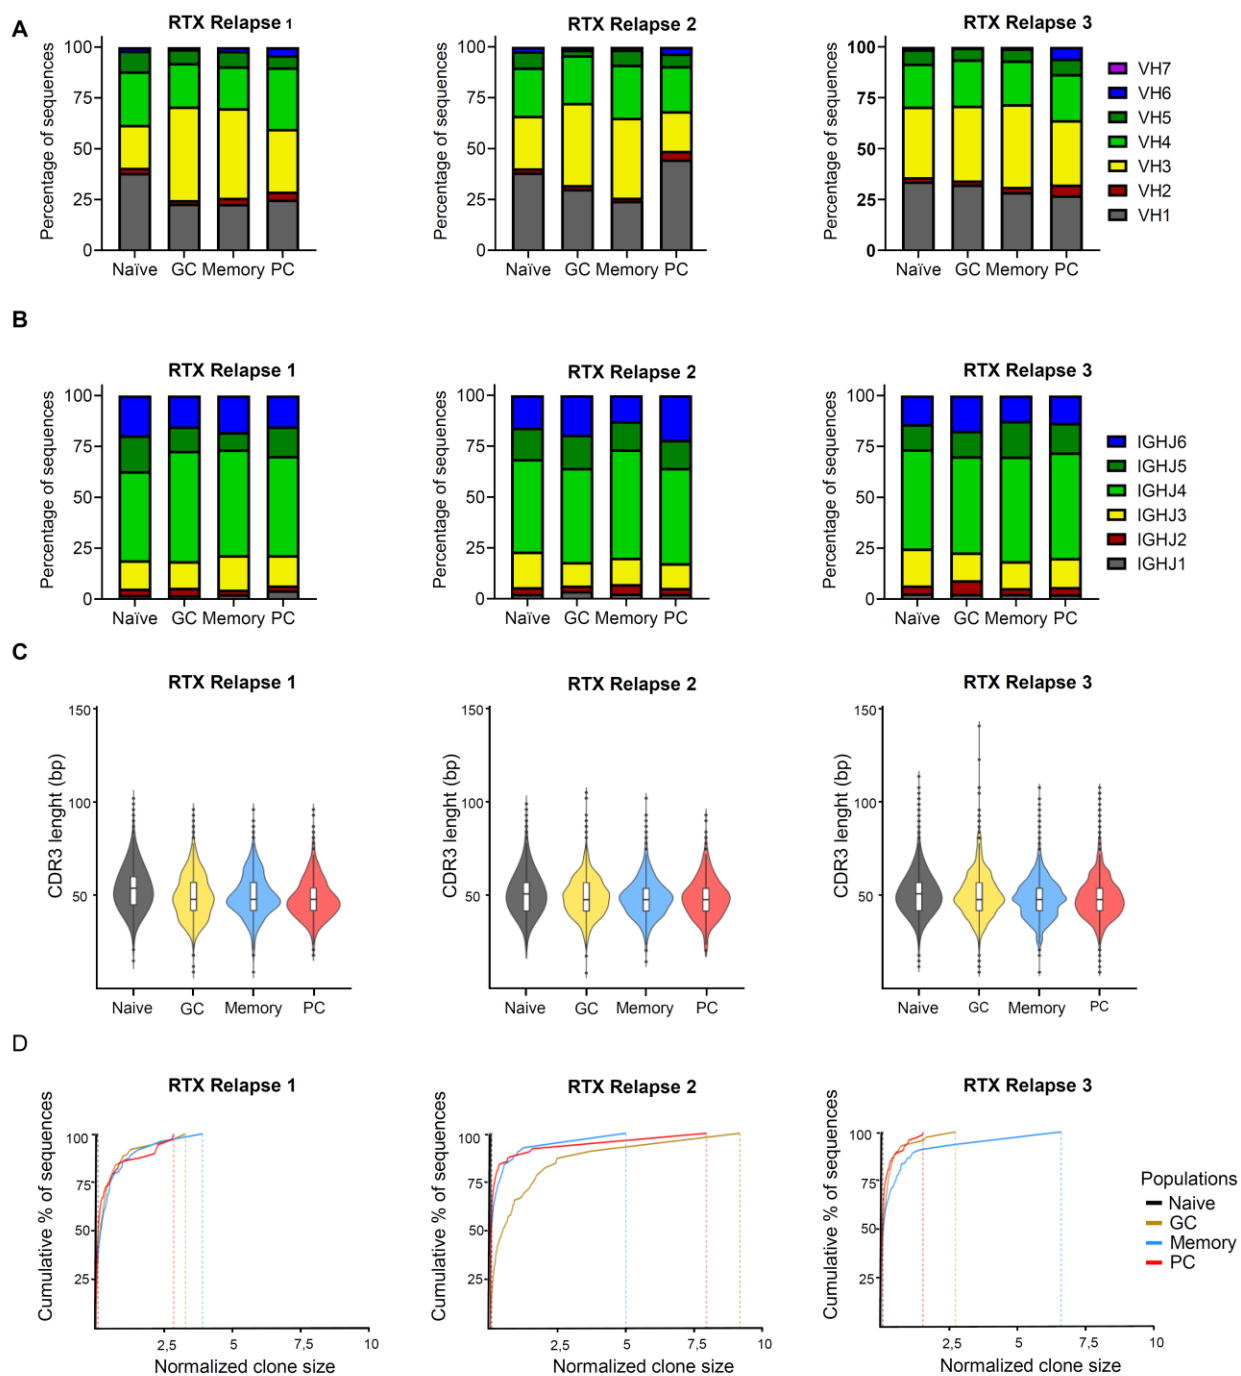

**Fig. S3. Splenic B cell repertoire in RTX-relapse patients.** High throughput IgH sequencing was used to analyze the splenic B cell repertoire of 3 patients with relapse after RTX (RTX relapse). VH (A) and JH (B) usage in sequences from naive, GC, memory and PC populations. (C) Violin plots showing CDR3 length distribution (in base pairs) in splenic B cell subsets. (D) Clonality of B cells subsets repertoire is shown by plotting the frequency of sequences in each individual clone among total sequences (clone size, horizontal axis), versus the contribution of individual clones to sequences (vertical axis) from smallest (bottom) to greatest (top). The naive B cell repertoire (green line), which contains only small clones, merges with the vertical axis, while antigen-experienced B cell repertoires exhibit variable clonal expansions.

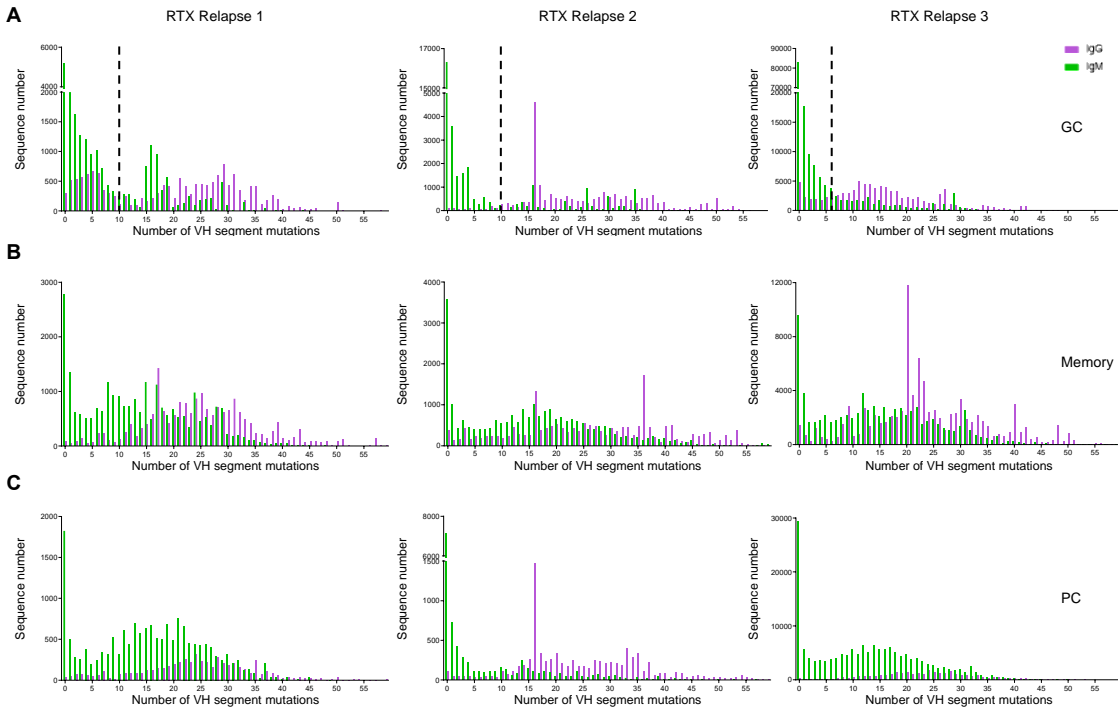

**Fig. S4. IgM sequences predominate in newly generated B cells and IgG sequences in RTX-resistant cells. (A-C)** VH segment mutation distribution in IgM (green) and IgG (purple) sequences from splenic GC (A), memory (B) and PC (C) populations from 3 patients with relapse after RTX (RTX relapse) assessed by high-throughput IgH sequencing.

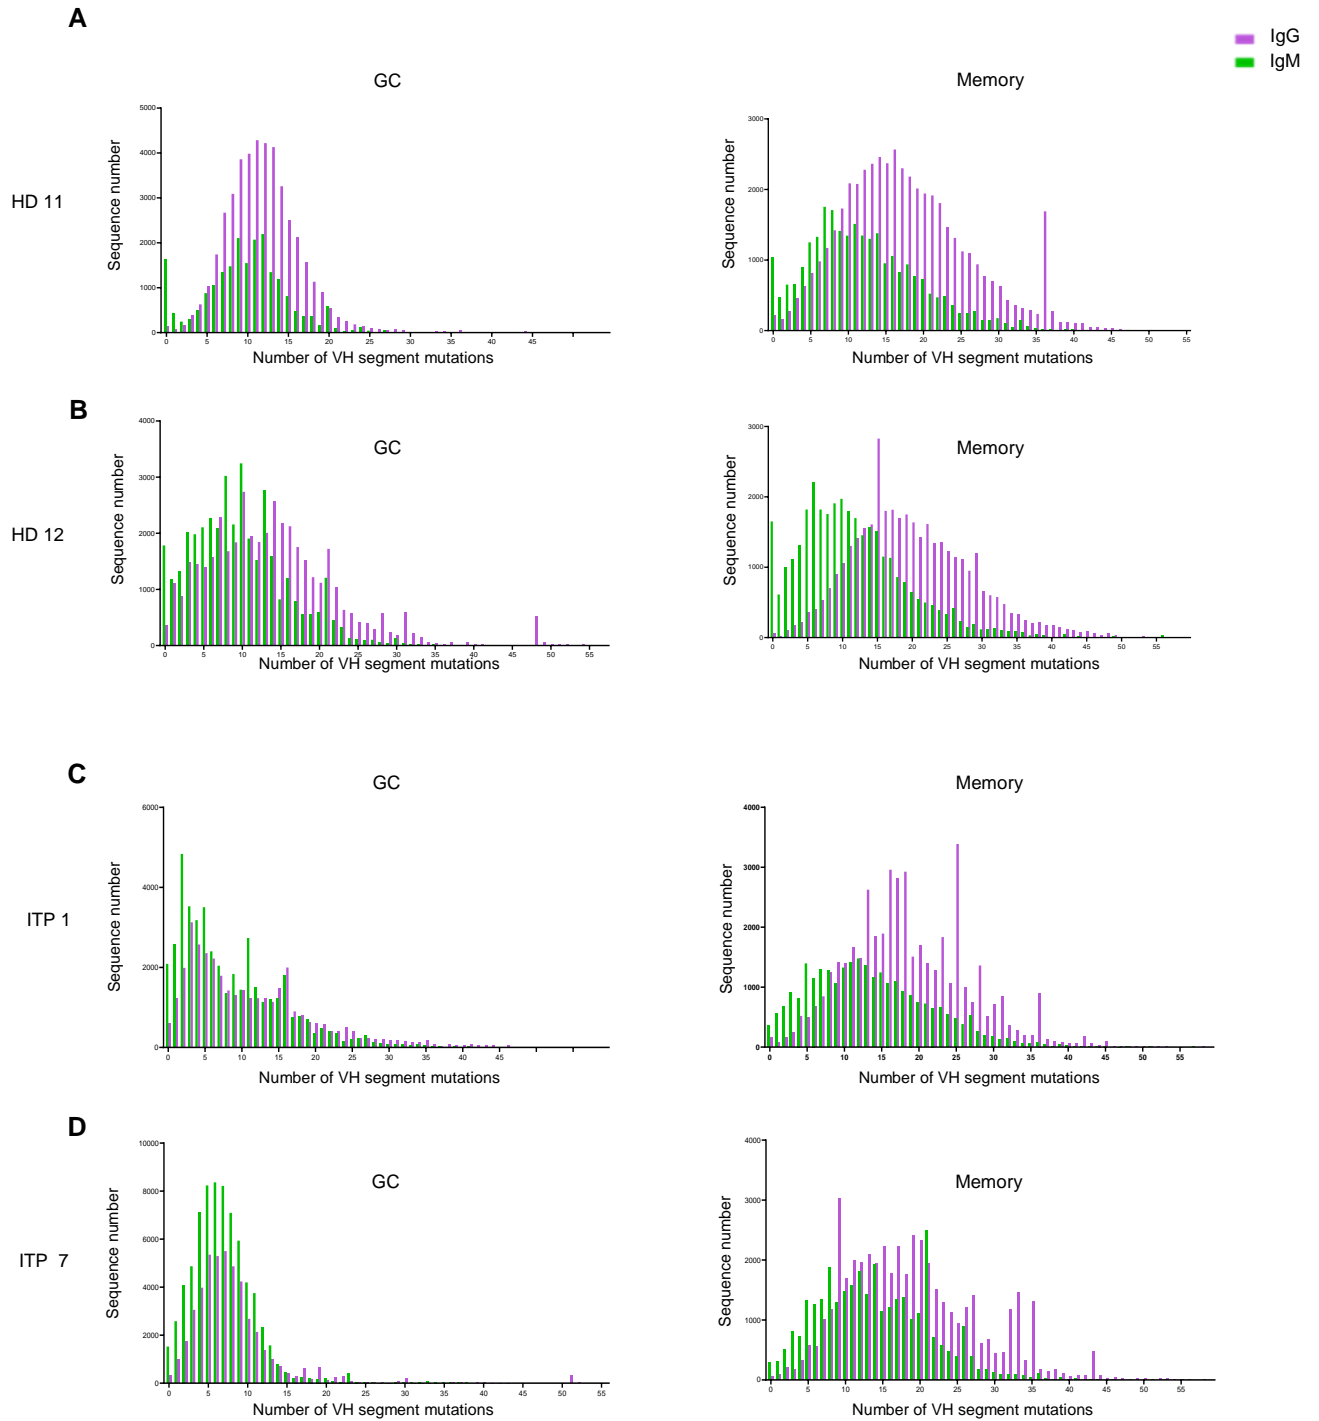

**Fig. S5. VH segment mutation distribution in HD and patients with ITP.** (A-D) VH segment mutation distribution in IgM (green) and IgG (purple) sequences from splenic GC and memory B cells populations from 2 HD (A, B) and 2 patients with ITP (C, D) assessed by high-throughput IgH sequencing.

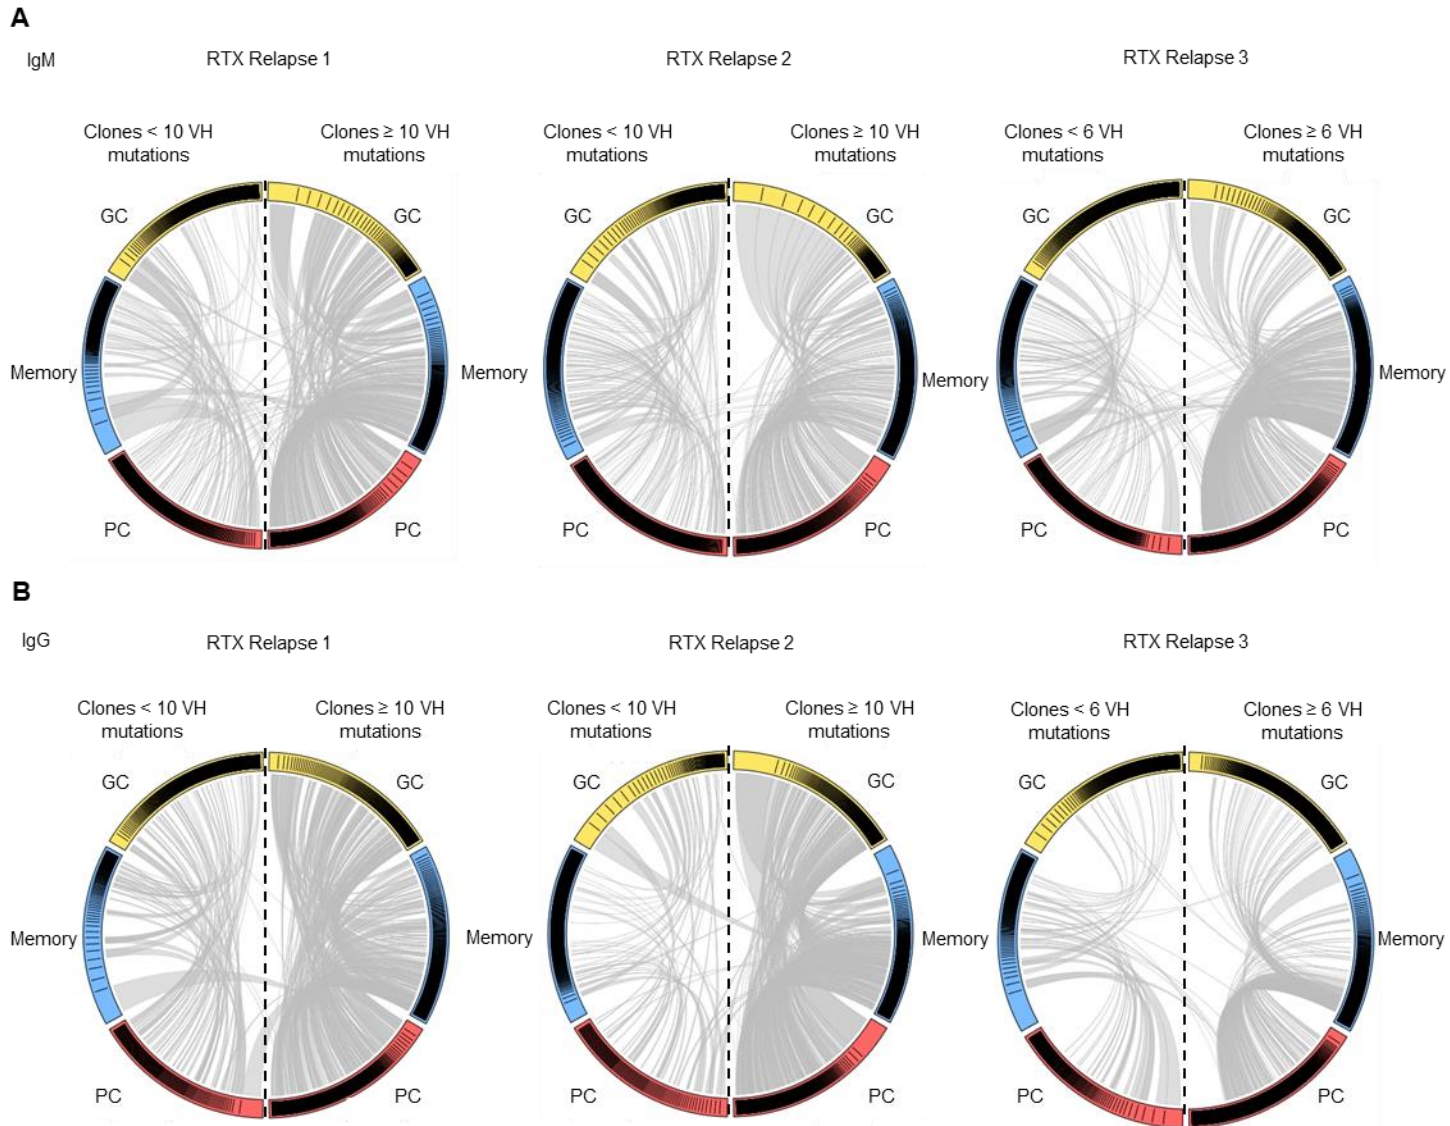

**Fig. S6. Circos plots showing clonal relationships among IgM and IgG B cell populations in RTX relapse patients. (A-B)** Circos plot showing clonal relationships shared between IgM (A) and IgG (B) sequences from GC, memory, and PC splenic populations. Clones from each population were classified into “lowly mutated” (left side of the plot) or “highly mutated” (right side of the plot) based on the clone median mutation number. Each colored sector represents one subpopulation and is divided into segments representing individual clones in rank-sized order. The internal connections show clones shared by multiple subpopulations.



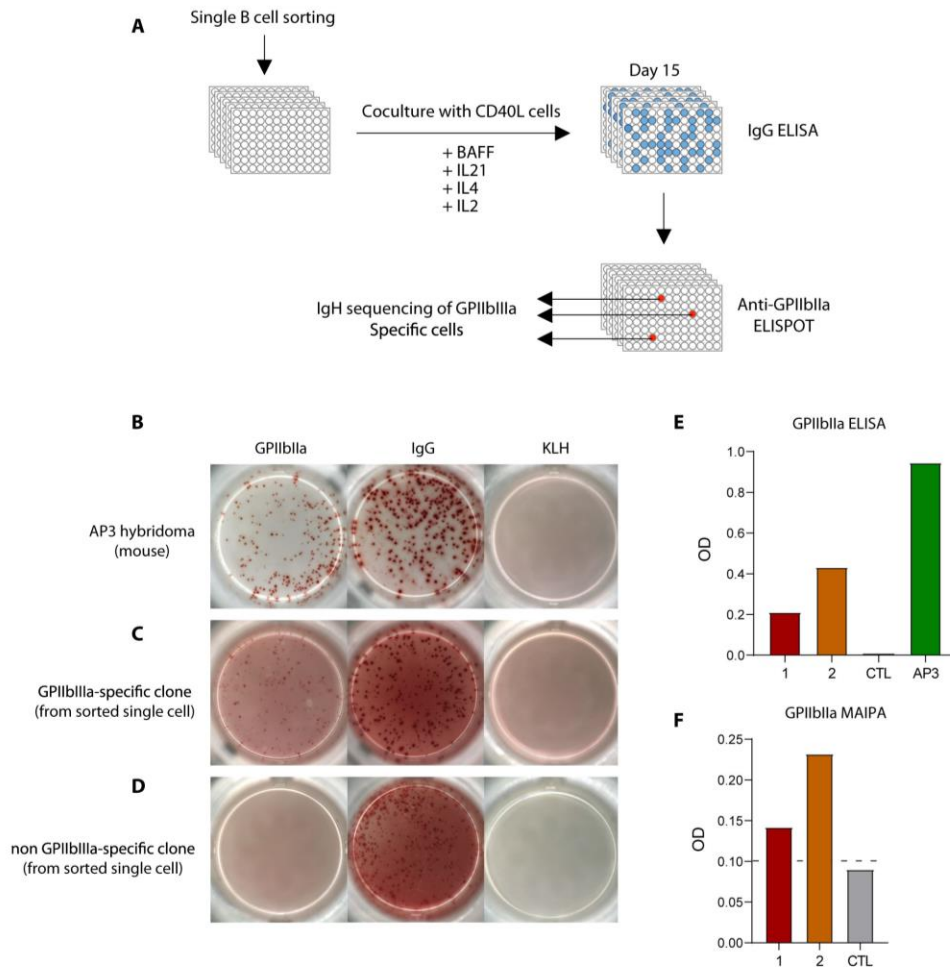

**Fig. S7. Detection of autoreactive clones using IgG anti-GPIIbIIIa ELISPOT.**

(A) To identify GPIIbIIIa-specific B cells, single GC and memory B cells were directly sorted into 96-well plates containing CD40L expressing cells and a cytokine cocktail and cultured for 15 days. IgG Enzyme-Linked Immunosorbent Assay (ELISA) was then performed on supernatants to select IgG secreting clones to be tested in a GPIIbIIIa ELISPOT. Cells from GPIIbIIIa-specific clones were collected for IgH sequencing. (B-D) IgG anti-GPIIbIIIa ELISPOT was used for the determination of clone specificities after single cell culture. The anti-GPIIbIIIa antibodies (mouse IgG1)-producing AP3 hybridoma was used for the validation of IgG anti-GPIIbIIIa ELISPOT. Representative pictures of wells containing AP3 hybridoma (B) or clones from GPIIbIIIa specific (C) or non-specific (D) single memory B cells cultured for 15 days on coated GPIIbIIIa (left), anti-human immunoglobulin (middle) and Keyhole Limpet Hemocyanin (KLH, right). (E-F) Immunoglobulin VH/VL genes from two clones (1 and 2) originating from GPIIbIIIa-specific single memory B cells were sequenced and cloned into Human Embryonic Kidney (HEK) cells. Anti-GPIIbIIIa ELISA (E) and Monoclonal Antibody Immobilization of Platelet Antigens (MAIPA) (F) performed with culture supernatants confirmed GPIIbIIIa reactivity. Irrelevant monoclonal human IgG1 was used as a negative control (CTL). Dotted line represents positive threshold for MAIPA assay.

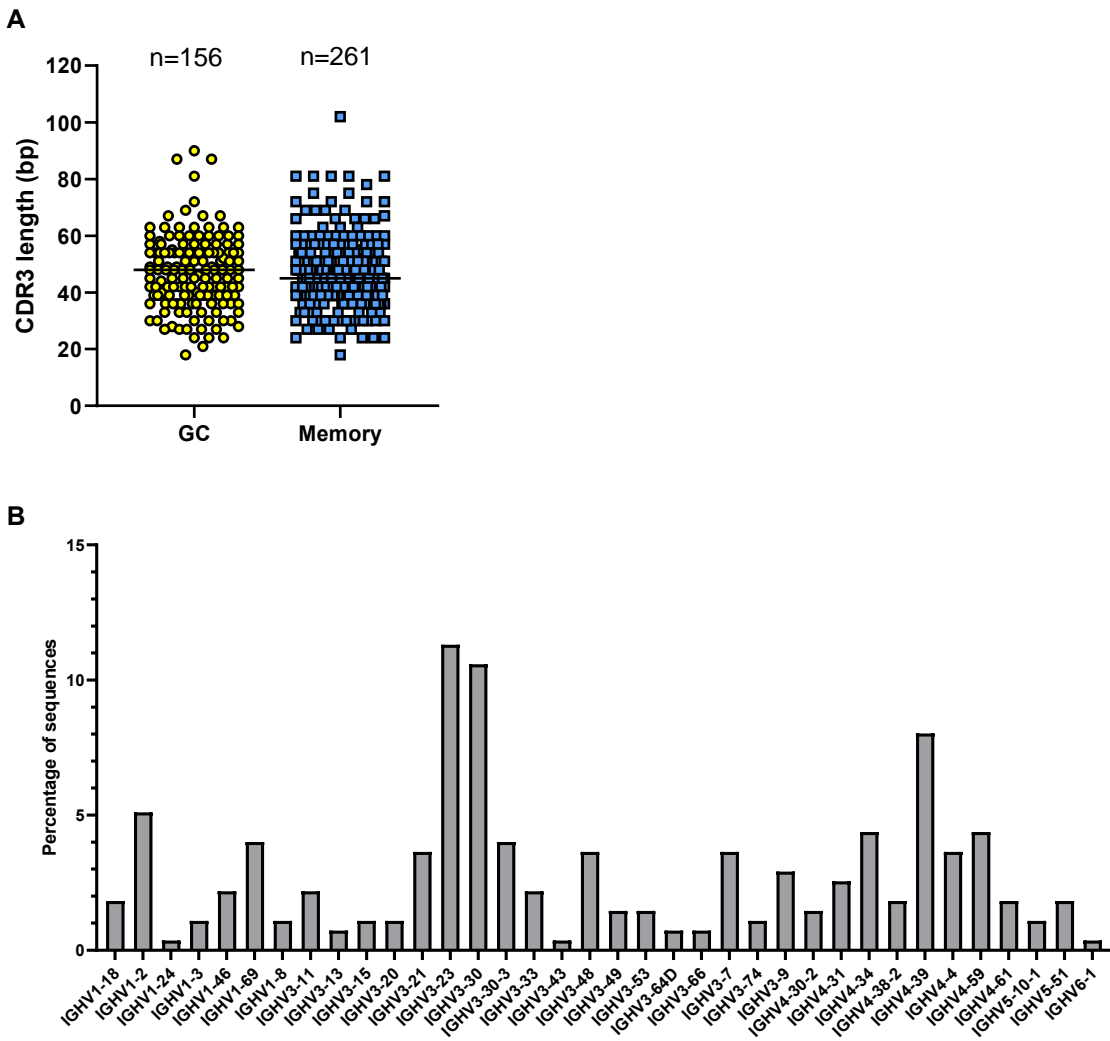

**Fig. S8. GPIIbIIIa-specific B cell repertoire.**

Sequences obtained from GPIIbIIIa specific GC (n= 156) and memory B cells (n=261) of patients with relapse after RTX (RTX relapse) were analyzed for CDR3 length (**A**) and VH gene distribution (**B**).

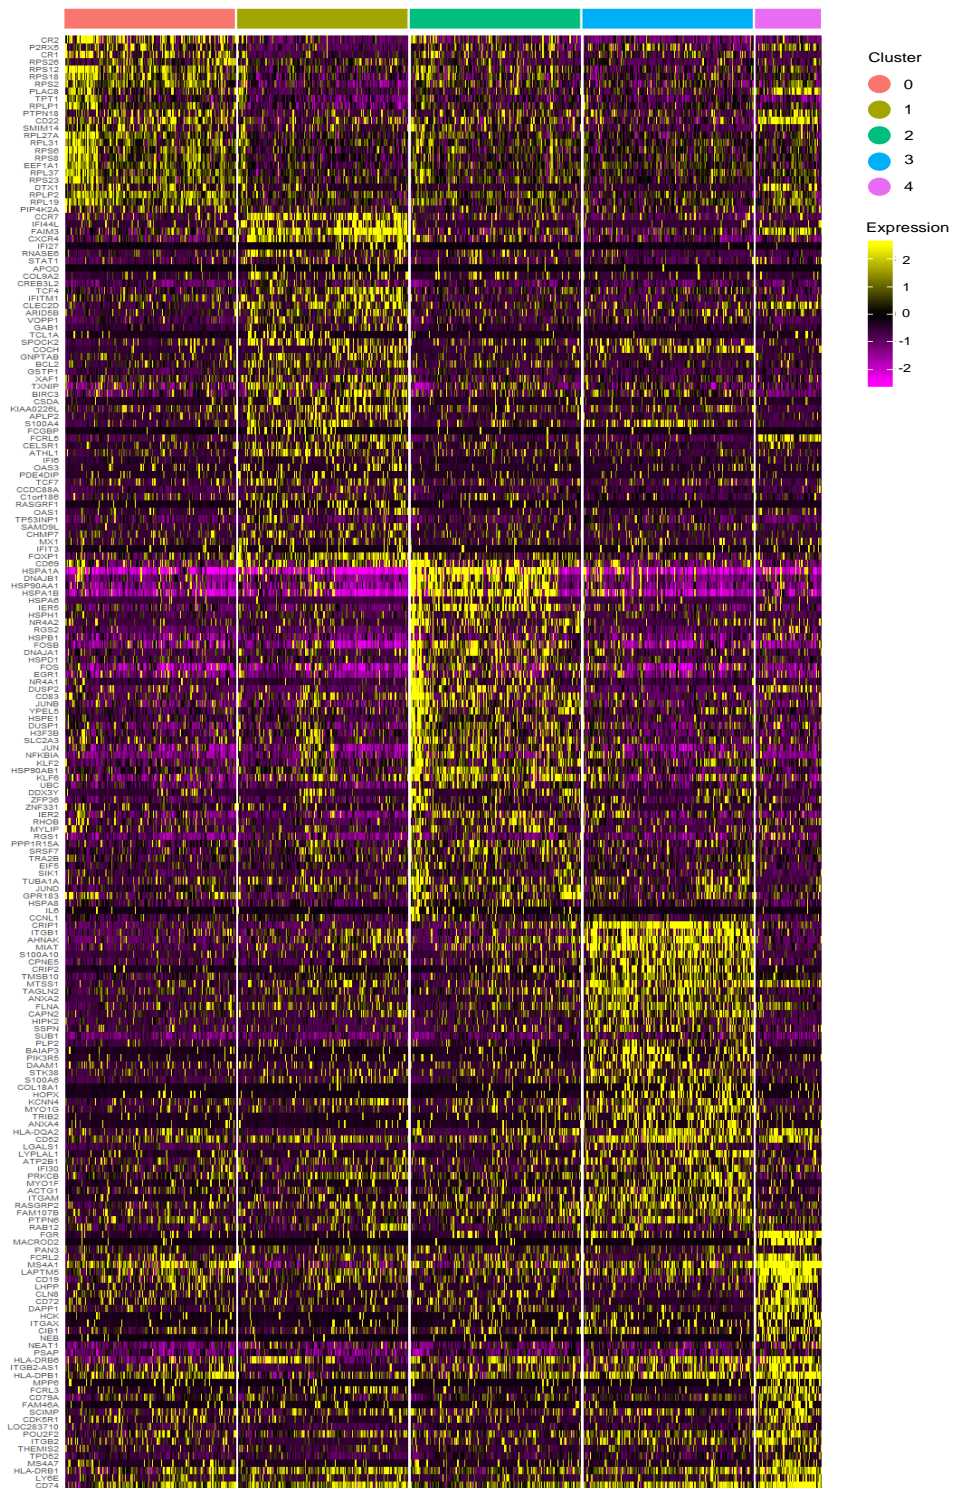

**Fig. S9. Top marker genes identified for each individual memory B cell cluster.**

Heatmap representing the scale expression (row-normalization) of the top markers genes identified for each of the five memory B cell clusters in the scRNA-seq dataset. Differential gene expression analysis was performed using the Model-based Analysis of Single-cell Transcriptomics (MAST) algorithm via the Seurat v3 R pipeline.

**A**

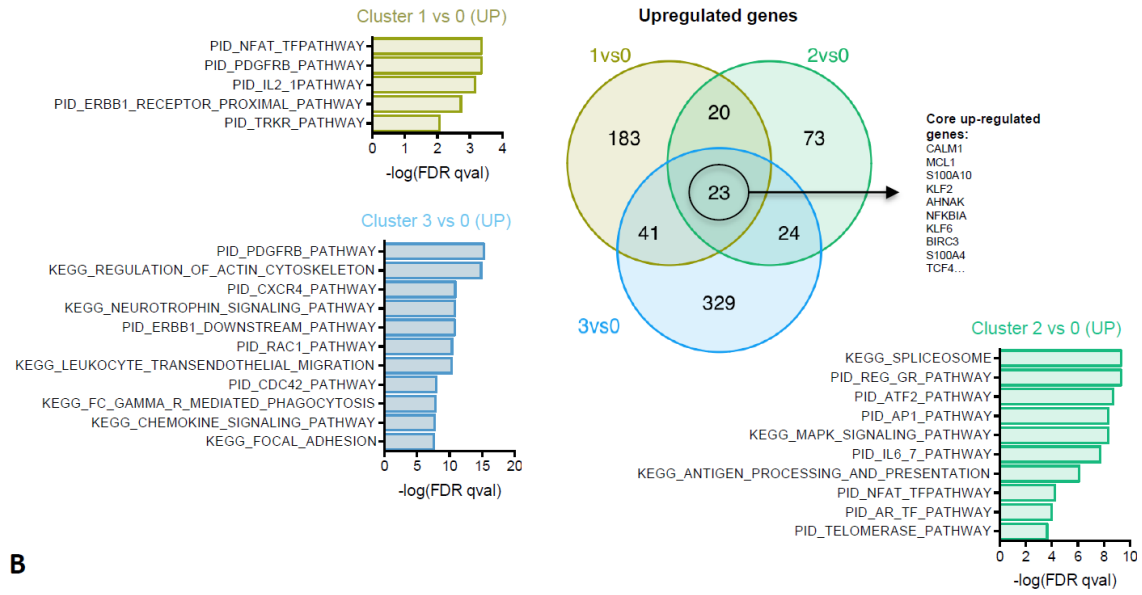

**B**

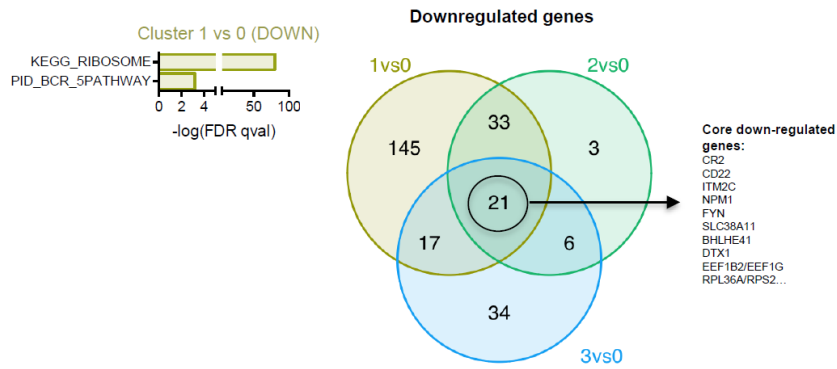

**C**

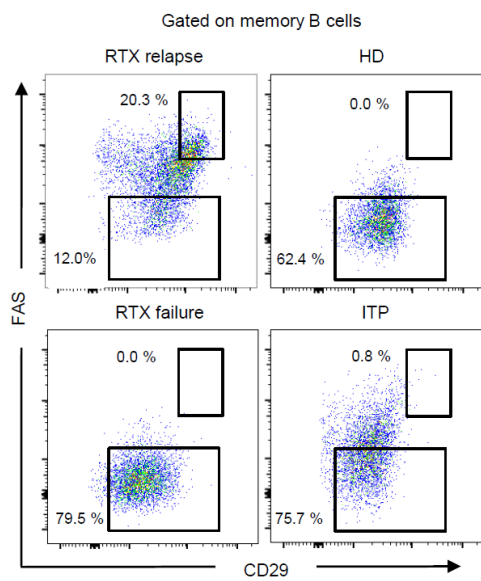

**D**

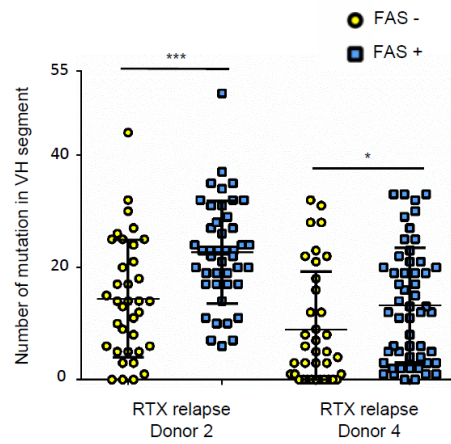

**Fig. S10. Characterization of memory B cells in RTX-relapse patients.**

**(A-B)** Venn diagrams of upregulated (A) and downregulated (B) genes in memory B cells from clusters 1, 2, and 3 as compared to memory B cells from cluster 0 (MAST,  $\log_{2}fc > 0.25$  and corrected  $P\text{-value} > 0.05$ ). Number of uniquely or co-regulated genes are indicated inside each corresponding area of the Venn diagram. Side graphs show enriched pathways in the indicated list of uniquely upregulated (A) or downregulated (B) genes in memory B cells from clusters 1, 2, and 3 as compared to memory B cells from cluster 0. The GSEA/Molecular Signature DataBase (MSigDB) online tool was used to compute overlaps (Broad Institute). **(C)** Representative dot plots showing FAS and CD29 staining on live  $CD3^{-} CD14^{-} CD19^{+} CD24^{+} CD38^{-} IgD^{-} CD27^{+}$  memory B cells in patients with relapse after RTX (RTX relapse, top left), HD (top right), patients with failure of RTX (RTX failure, left bottom) and patients with ITP (right bottom). Gates and frequencies of FAS<sup>+</sup> and FAS<sup>-</sup> populations are displayed. **(D)** Number of mutations in VH segment in sorted FAS<sup>+</sup> and FAS<sup>-</sup> memory B cells from 2 patients with relapse after RTX (RTX relapse). Single cell-sorted FAS<sup>+</sup> and FAS<sup>-</sup> memory B cells underwent single-cell IgH sequencing and individual IgH sequences were then analyzed using CodonCode and the IMGT/HighV-QUEST web portal. Two-tailed Mann-Whitney tests were performed (\*\* $P < 0.001$ ; \* $P < 0.05$ ).

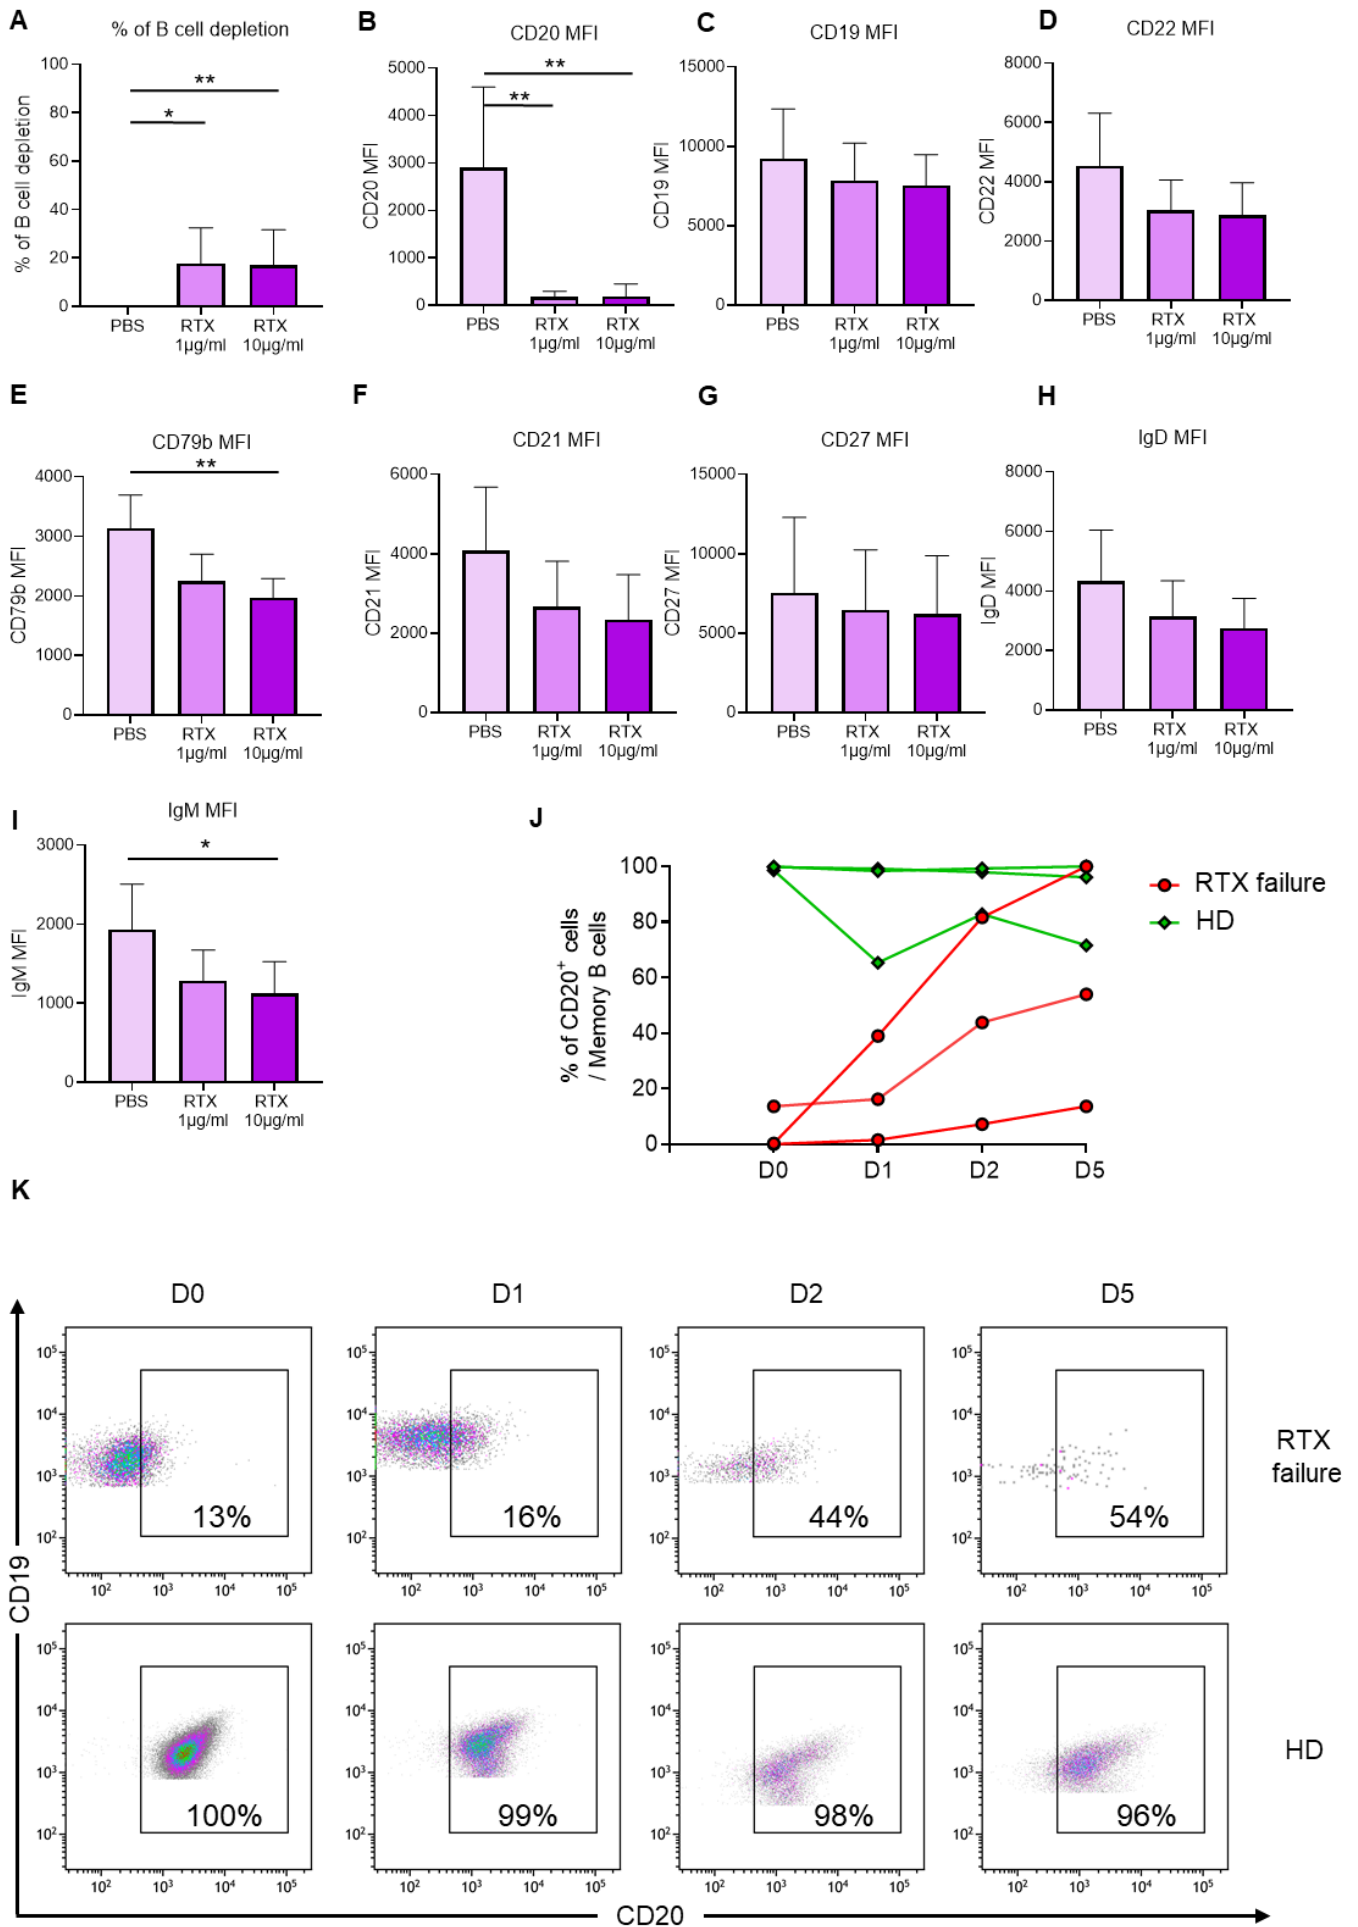

**Fig. S11. In vitro exposure to RTX induces a residual memory B cell-like phenotype in human splenic memory B cells.**

Fresh total splenocytes from HD (n=5) were incubated overnight with RTX (1 or 10  $\mu\text{g/ml}$ ) or phosphate buffered saline (PBS). **(A)** Percentage of B cell depletion, calculated with the following formula:  $100 - [(\text{B cell:T cell ratio in sample with RTX})/(\text{B cell:T cell ratio in sample with PBS}) \times 100]$ . **(B-G)** Histograms showing Median Fluorescence Intensity (MFI)  $\pm$  standard deviation (SD) of CD20, CD19, CD22, CD79b, CD21 and CD27 on total B cells. **(H-I)** Histograms showing MFIs $\pm$ SD of IgD and IgM on CD27<sup>-</sup> B cells. Kruskal-Wallis and corrections for multiple comparisons were performed (\*\*P < 0.01, \*P < 0.05). Percentage **(J)** and representative dot plots **(K)** showing CD20 expression assessed by flow cytometry analysis on memory B cells at day 0 (D0), D1, D2 and D5 of in vitro culture of splenocytes from HD (green, N=3) and patients with RTX failure (RTX failure, red, N=3). An increase in CD20 expression was observed in memory B cells from patients with RTX failure starting from D1.

**Table S1. Patient characteristics.** AZA: Azathioprine, CR: Complete Response CSA: Cyclosporine A, CST: Corticosteroids, IvIg: Intravenous immunoglobulins, DAPS: Dapsone, HCQ: Hydroxychloroquine, MMF: Mycophenolate mofetil, NA: Not applicable, TPO-RA: Thrombopoietin receptor agonists, RTX: Rituximab.

| Patients      | Age/Gender | ITP duration (months) before splenectomy | Interval between RTX and splenectomy (months) | Response to RTX (duration, months) | Treatments received before RTX and splenectomy | Treatments received during the month preceding splenectomy | Response to splenectomy |
|---------------|------------|------------------------------------------|-----------------------------------------------|------------------------------------|------------------------------------------------|------------------------------------------------------------|-------------------------|
| RTX_relapse1  | 30/F       | 26                                       | 12                                            | CR (6 months)                      | CST, IvIg                                      | IvIg                                                       | Failure                 |
| RTX_relapse2  | 61/F       | 28                                       | 15                                            | CR (13 months)                     | CST, danazol                                   | CST                                                        | CR                      |
| RTX_relapse3  | 42/F       | 21                                       | 12                                            | CR (11 months)                     | CST                                            | CST                                                        | CR                      |
| RTX_relapse4  | 51/M       | 60                                       | 11                                            | CR (5 months)                      | CST, IvIg                                      | IvIg                                                       | CR                      |
| RTX_relapse5  | 65/M       | 15                                       | 11                                            | CR (6 months)                      | CST                                            | CST                                                        | CR                      |
| RTX_relapse6  | 52/F       | 44                                       | 8                                             | CR (6 months)                      | CST, IvIg, danazol                             | CST, IvIg                                                  | Failure                 |
| RTX_relapse7  | 45/F       | 21                                       | 14                                            | CR (12 months)                     | CST, DAPS                                      | CST                                                        | CR                      |
| RTX_relapse8  | 62/F       | 156                                      | 14                                            | CR (12 months)                     | CST, TPO-RA, IvIg, DAPS                        | TPO-RA, IvIg                                               | CR                      |
| RTX_failure1  | 59/F       | 12                                       | 4                                             | Failure                            | CST, IvIg                                      | CST, IvIg                                                  | CR                      |
| RTX_failure2  | 39/M       | 360                                      | 4                                             | Failure                            | CST                                            | CST                                                        | CR                      |
| RTX_failure3  | 22/F       | 12                                       | 3                                             | Failure                            | TPO-RA, CST, Vcr                               | TPO-RA, CST                                                | CR                      |
| RTX_failure4  | 24/M       | 36                                       | 1                                             | Failure                            | CST, Vcr                                       | CST, Vcr, tacrolimus                                       | CR                      |
| RTX_failure5  | 48/F       | 24                                       | 4                                             | Failure                            | CST, IvIg, AZA                                 | CST, IvIg, AZA                                             | Failure                 |
| RTX_failure6  | 51/F       | 3                                        | 3                                             | Failure                            | CST, IvIg, Vcr, danazol                        | CST, IvIg, Vcr, danazol                                    | CR                      |
| RTX_failure7  | 76/M       | 23                                       | 9                                             | Failure                            | TPO-RA, CST, IvIg                              | CST                                                        | Failure                 |
| RTX_failure8  | 54/M       | 3                                        | 4                                             | Failure                            | CST, DAPS                                      | CST, DAPS                                                  | Failure                 |
| RTX_failure9  | 66/F       | 6                                        | 4                                             | Failure                            | CST, IvIg, DAPS                                | CST, IvIg                                                  | CR                      |
| RTX_failure10 | 27/M       | 8                                        | 6                                             | Failure                            | CST, IvIg, DAPS, HCQ                           | CST, IvIg, DAPS, HCQ                                       | CR                      |
| RTX_failure11 | 18/M       | 6                                        | 2                                             | Failure                            | CST, IvIg, TPO-RA, Vcr                         | CST, IvIg, TPO-RA                                          | CR                      |
| RTX_failure12 | 36/F       | 6                                        | 3                                             | Failure                            | CST, IvIg, TPO-RA, Vcr, AZA                    | CST, IvIg, TPO-RA, Vcr                                     | CR                      |
| RTX_failure13 | 28/F       | 36                                       | 6                                             | Failure                            | CST, IvIg, DAPS, Vcr                           | CST, IvIg, DAPS, Vcr                                       | CR                      |
| RTX_failure14 | 74/F       | 48                                       | 6                                             | Failure                            | CST, IvIg, DAPS                                | CST, IvIg, DAPS                                            | Failure                 |
| RTX_failure15 | 67/M       | 6                                        | 6                                             | Failure                            | CST, IvIg, TPO-RA, danazol, MMF                | CST, IvIg                                                  | CR                      |
| RTX_failure16 | 37/M       | 60                                       | 1                                             | Failure                            | CST, IvIg, TPO-RA, CSA, MMF                    | CST, IvIg, TPO-RA, CSA, MMF                                | CR                      |
| RTX_failure17 | 59/F       | 120                                      | 4                                             | Failure                            | CST IvIg                                       | CST IVIg                                                   | CR                      |
| RTX_failure18 | 37/M       | 12                                       | 2                                             | Failure                            | CST, IVIg, TPO-RA, AZA                         | CST, IVIg, TPO-RA, AZA                                     | CR                      |
| RTX_failure19 | 26/M       | 6                                        | 4                                             | Failure                            | CST, IVIg, TOP-RA, MMF                         | CST, IVIg                                                  | Failure                 |
| ITP1          | 25/F       | 84                                       | NA                                            | NA                                 | CST, IvIg, DAPS                                | CST                                                        | CR                      |
| ITP2          | 40/F       | 12                                       | NA                                            | NA                                 | IgIV, AZA, CST, DAPS                           | IgIV, AZA                                                  | CR                      |
| ITP3          | 60/H       | 36                                       | NA                                            | NA                                 | CST, IvIg                                      | IgIV                                                       | CR                      |
| ITP4          | 50/F       | 28                                       | NA                                            | NA                                 | CST, TPO-RA                                    | TPO-RA                                                     | CR                      |
| ITP5          | 58/M       | 144                                      | NA                                            | NA                                 | CST, IvIg, TPO-RA                              | IvIg, TPO-RA                                               | CR                      |
| ITP6          | 22/M       | 24                                       | NA                                            | NA                                 | CST                                            | CST                                                        | Failure                 |
| ITP7          | 18/F       | 12                                       | NA                                            | NA                                 | CST                                            | CST                                                        | CR                      |
| HD1           | 52/F       | NA                                       | NA                                            | NA                                 | NA                                             | NA                                                         | NA                      |
| HD2           | 22/M       | NA                                       | NA                                            | NA                                 | NA                                             | NA                                                         | NA                      |
| HD3           | 32/F       | NA                                       | NA                                            | NA                                 | NA                                             | NA                                                         | NA                      |
| HD4           | 52/F       | NA                                       | NA                                            | NA                                 | NA                                             | NA                                                         | NA                      |
| HD5           | 28/M       | NA                                       | NA                                            | NA                                 | NA                                             | NA                                                         | NA                      |
| HD6           | 62/M       | NA                                       | NA                                            | NA                                 | NA                                             | NA                                                         | NA                      |
| HD7           | 64/M       | NA                                       | NA                                            | NA                                 | NA                                             | NA                                                         | NA                      |
| HD8           | 90/F       | NA                                       | NA                                            | NA                                 | NA                                             | NA                                                         | NA                      |
| HD9           | 68/M       | NA                                       | NA                                            | NA                                 | NA                                             | NA                                                         | NA                      |
| HD10          | 60/F       | NA                                       | NA                                            | NA                                 | NA                                             | NA                                                         | NA                      |
| HD 11         | 21/F       | NA                                       | NA                                            | NA                                 | NA                                             | NA                                                         | NA                      |
| HD 12         | 34/F       | NA                                       | NA                                            | NA                                 | NA                                             | NA                                                         | NA                      |
| YD1           | 5/F        | NA                                       | NA                                            | NA                                 | NA                                             | NA                                                         | NA                      |
| YD2           | 4/M        | NA                                       | NA                                            | NA                                 | NA                                             | NA                                                         | NA                      |
| YD3           | 4/F        | NA                                       | NA                                            | NA                                 | NA                                             | NA                                                         | NA                      |
| YD4           | 4.5/M      | NA                                       | NA                                            | NA                                 | NA                                             | NA                                                         | NA                      |



**Table S2. Immunoglobulin heavy chain sequencing.** \*d50 : number of top size-ranked clones accounting for 50% of unique sequences

| Patient       | Population | Number of sorted cells | Isotype | Raw reads | Submitted to IMGT | Number of productive sequences | Number of unique sequences | Number of clones | d50* |
|---------------|------------|------------------------|---------|-----------|-------------------|--------------------------------|----------------------------|------------------|------|
| RTX relapse 1 | Naive      | 100000                 | MU      | 113836    | 7912              | 17975                          | 7690                       | 7579             | 2775 |
|               | Memory     | 130000                 | GAMMA   | 104892    | 2773              | 19307                          | 2535                       | 1167             | 69   |
|               |            |                        | MU      | 105582    | 5833              | 24859                          | 5509                       | 3042             | 35   |
|               | GC         | 70000                  | GAMMA   | 101734    | 3058              | 15481                          | 2861                       | 1294             | 82   |
|               |            |                        | MU      | 105943    | 4082              | 23315                          | 3394                       | 1336             | 50   |
|               | PC         | 70000                  | GAMMA   | 172413    | 1847              | 5820                           | 1817                       | 1221             | 142  |
| MU            |            |                        | 110724  | 3119      | 16658             | 3072                           | 1546                       | 101              |      |
| RTX relapse 2 | Naive      | 100000                 | MU      | 107764    | 7892              | 16734                          | 7630                       | 7518             | 2763 |
|               | Memory     | 200000                 | GAMMA   | 119216    | 5991              | 20012                          | 5581                       | 3625             | 61   |
|               |            |                        | MU      | 103684    | 5814              | 24496                          | 5216                       | 2951             | 203  |
|               | GC         | 10000                  | GAMMA   | 116882    | 2676              | 23672                          | 2484                       | 575              | 24   |
|               |            |                        | MU      | 102299    | 3327              | 34079                          | 3123                       | 1042             | 21   |
|               | PC         | 50000                  | GAMMA   | 147534    | 2223              | 8985                           | 2155                       | 1286             | 60   |
| MU            |            |                        | 96436   | 2784      | 11445             | 2758                           | 2166                       | 391              |      |
| RTX relapse 3 | Naive      | 100000                 | MU      | 1410223   | 50521             | 119460                         | 45552                      | 38568            | 9259 |
|               | Memory     | 30000                  | GAMMA   | 1302391   | 17385             | 92280                          | 15358                      | 5157             | 33   |
|               |            |                        | MU      | 1481840   | 16294             | 80997                          | 13508                      | 5448             | 349  |
|               | GC         | 20000                  | GAMMA   | 1384055   | 22692             | 88691                          | 19497                      | 5806             | 217  |
|               |            |                        | MU      | 1600195   | 30613             | 160998                         | 26058                      | 6523             | 104  |
|               | PC         | 80000                  | GAMMA   | 1427490   | 12732             | 31536                          | 11805                      | 7002             | 451  |
| MU            |            |                        | 1766698 | 35347     | 163650            | 33758                          | 10485                      | 288              |      |

**Table S3. Mean standard deviation of  $V_H$  mutation numbers in the first 100 clones.**

|               | <b>GC</b> | <b>Memory</b> | <b>PC</b> |
|---------------|-----------|---------------|-----------|
| RTX relapse 1 | 1.5295    | 1.9508        | 2.8172    |
| RTX relapse 2 | 1.5959    | 2.2332        | 2.0971    |
| RTX relapse 3 | 3.6396    | 2.2199        | 3.7895    |

**Table S4. Identification of anti-GPIIb/IIIa-specific single B cells.** \*lack of in vitro activation.

| Patients     | Subset                  | Number of sorted cells | Number of IgG secreting clones | Number of GPIIb/IIIa specific clones | Percentage of GPIIb/IIIa specific clones among IgG secreting clones |
|--------------|-------------------------|------------------------|--------------------------------|--------------------------------------|---------------------------------------------------------------------|
| RTX_relapse1 | GC                      | 1152                   | 214                            | 47                                   | 21.96                                                               |
| RTX_relapse1 | IgG <sup>+</sup> Memory | 1152                   | 438                            | 51                                   | 11.64                                                               |
| RTX_relapse2 | GC                      | 1440                   | 89                             | 31                                   | 34.83                                                               |
| RTX_relapse2 | IgG <sup>+</sup> Memory | 576                    | 236                            | 61                                   | 25.85                                                               |
| RTX_relapse3 | GC                      | 1632                   | 190                            | 27                                   | 14.21                                                               |
| RTX_relapse3 | IgG <sup>+</sup> Memory | 1248                   | 430                            | 68                                   | 15.81                                                               |
| RTX_relapse4 | GC                      | 1056                   | 261                            | 41                                   | 15.71                                                               |
| RTX_relapse4 | IgG <sup>+</sup> Memory | 672                    | 307                            | 42                                   | 13.68                                                               |
| RTX_relapse5 | GC                      | 480                    | 84                             | 0                                    | 0.00                                                                |
| RTX_relapse5 | IgG <sup>+</sup> Memory | 480                    | 113                            | 0                                    | 0.00                                                                |
| RTX_relapse6 | GC                      | 576                    | 36                             | 7                                    | 19.44                                                               |
| RTX_relapse6 | IgG <sup>+</sup> Memory | 576                    | 241                            | 38                                   | 15.77                                                               |
| RTX_relapse7 | GC                      | 576                    | 90                             | 3                                    | 3.33                                                                |
| RTX_relapse7 | IgG <sup>+</sup> Memory | 576                    | 127                            | 1                                    | 0.79                                                                |
| RTX_relapse8 | GC                      | 576                    | 0*                             | 0                                    | ND                                                                  |
| RTX_relapse8 | IgG <sup>+</sup> Memory | 576                    | 0*                             | 0                                    | ND                                                                  |
| RTX_failure1 | Residual Memory         | 1152                   | 179                            | 27                                   | 15.00                                                               |
| RTX_failure2 | Residual Memory         | 1152                   | 43                             | 2                                    | 4.70                                                                |
| RTX_failure3 | Residual Memory         | 768                    | 124                            | 13                                   | 11.00                                                               |
| RTX_failure4 | Residual Memory         | 1152                   | 134                            | 16                                   | 12.00                                                               |
| HD5          | GC                      | 576                    | 89                             | 3                                    | 3.37                                                                |
| HD5          | IgG <sup>+</sup> Memory | 288                    | 157                            | 1                                    | 0.64                                                                |
| HD6          | GC                      | 576                    | 80                             | 0                                    | 0.00                                                                |
| HD6          | IgG <sup>+</sup> Memory | 576                    | 230                            | 0                                    | 0.00                                                                |
| HD8          | GC                      | 576                    | 227                            | 9                                    | 3.96                                                                |
| HD8          | IgG <sup>+</sup> Memory | 288                    | 183                            | 3                                    | 1.64                                                                |

**Table S5. scRNA-seq statistics. YD: Young Donor.**

| Patient       | Sort_ID       | High quality cells | Mean Reads per cell        | Mean Transcripts (UMI) per cell  | Mean Genes per cells       | Number of cells per cluster      |                  |                  |                  |                  |
|---------------|---------------|--------------------|----------------------------|----------------------------------|----------------------------|----------------------------------|------------------|------------------|------------------|------------------|
|               |               |                    |                            |                                  |                            | Cluster 0                        | Cluster 1        | Cluster 2        | Cluster 3        | Cluster 4        |
| HD1           | 2019_2        | 217                | 62597                      | 4301                             | 1441                       | 211                              | 5                | 0                | 1                | 0                |
| HD2           | 2019_3        | 233                | 90801                      | 6586                             | 2004                       | 215                              | 5                | 0                | 7                | 6                |
| HD4           | 2019_0        | 53                 | 177809                     | 10237                            | 2274                       | 51                               | 2                | 0                | 0                | 0                |
| ITP1          | 2019_2        | 274                | 79634                      | 5534                             | 1690                       | 262                              | 2                | 3                | 4                | 3                |
| ITP2          | 2019_3        | 238                | 73642                      | 5138                             | 1655                       | 116                              | 21               | 71               | 5                | 25               |
| ITP3          | 2019_4/2019_1 | 362                | 91035                      | 5276                             | 1678                       | 335                              | 7                | 1                | 12               | 7                |
| RTX-failure 1 | 2019_2        | 254                | 83192                      | 5692                             | 1873                       | 29                               | 206              | 12               | 6                | 1                |
| RTX-failure 2 | 2019_3        | 259                | 85034                      | 6221                             | 1957                       | 61                               | 127              | 70               | 1                | 0                |
| RTX-failure 3 | 2019_4        | 267                | 91030                      | 4485                             | 1620                       | 24                               | 241              | 2                | 0                | 0                |
| RTX-relapse 2 | 2019_3        | 237                | 80324                      | 5524                             | 1791                       | 63                               | 7                | 69               | 90               | 8                |
| RTX-relapse 3 | 2019_2        | 240                | 80041                      | 5515                             | 1717                       | 40                               | 8                | 149              | 42               | 1                |
| RTX-relapse 4 | 2019_4        | 230                | 112451                     | 5540                             | 1726                       | 39                               | 8                | 106              | 76               | 1                |
| YD1           | 2019_0        | 57                 | 159489                     | 7789                             | 1952                       | 1                                | 2                | 54               | 0                | 0                |
| YD2           | 2019_0        | 63                 | 85367                      | 5211                             | 1518                       | 24                               | 3                | 32               | 3                | 1                |
| YD3           | 2019_0        | 42                 | 109403                     | 6122                             | 1758                       | 26                               | 6                | 8                | 2                | 0                |
| YD4           | 2019_0        | 90                 | 115433                     | 7193                             | 2056                       | 72                               | 6                | 6                | 6                | 0                |
|               |               |                    |                            |                                  |                            | <b>nb total cell per cluster</b> |                  |                  |                  |                  |
|               |               | <b>Total cells</b> | <b>Mean Reads per cell</b> | <b>Mean Transcripts per cell</b> | <b>Mean Genes per cell</b> | <b>Cluster 0</b>                 | <b>Cluster 1</b> | <b>Cluster 2</b> | <b>Cluster 3</b> | <b>Cluster 4</b> |
|               |               | 3116               | 98580                      | 6023                             | 1794                       | 1569                             | 656              | 583              | 255              | 53               |

**Table S6. Antibodies and clones.**

| Antigen                   | Fluorochrome                                          | Origin                   | Clone      |
|---------------------------|-------------------------------------------------------|--------------------------|------------|
| CD38                      | peridinin chlorophyll protein (PerCP)-Cyanin (Cy) 5.5 | Sony                     | HIT2       |
| CD38                      | Brilliant Blue 700                                    | BD Biosciences           | HIT2       |
| CD27                      | Allophycocyanin (APC)                                 | Sony                     | MT271      |
| CD27                      | Phycoerythrin (PE)-Cy7                                | BD Biosciences           | LG.3A10    |
| CD19                      | PE-CF594                                              | BD Biosciences           | HIB19      |
| CD19                      | Alexa Fluor 700                                       | BD Biosciences           | HIB20      |
| CD24                      | Fluorescein isothiocyanate (FITC)                     | BD Biosciences           | ML5        |
| CD24                      | PE-Cy7                                                | Sony                     | ML5        |
| CD24                      | FITC                                                  | BD Biosciences           | ML5        |
| CD21                      | PE-Cy7                                                | BD Biosciences           | BLY4       |
| CD20                      | APC-H7                                                | BD Biosciences           | 2H7        |
| CD3                       | Alexa Fluor 700                                       | BD Biosciences           | UCHT1      |
| CD3                       | Brilliant Ultraviolet 395                             | BD Biosciences           | UCHT1      |
| CD3                       | PE                                                    | BD Biosciences           | UCHT1      |
| CD14                      | Alexa Fluor 700                                       | BD Biosciences           | MφP9       |
| CD14                      | Brilliant Ultraviolet 395                             | BD Biosciences           | MφP9       |
| CD14                      | PE                                                    | BD Biosciences           | M5E2       |
| CD16                      | Brilliant Ultraviolet 395                             | BD Biosciences           | 3G8        |
| CD16                      | PE                                                    | BD Biosciences           | 3G8        |
| CD16                      | Alexa Fluor 700                                       | BD Biosciences           | 3G8        |
| CD10                      | PE                                                    | BD Biosciences           | Hi10a      |
| CD95                      | APC                                                   | BioLegend                | DX2        |
| CD29                      | APC                                                   | BioLegend                | TS2/16     |
| CD29                      | PE                                                    | BioLegend                | TS2/16     |
| IgD                       | Brilliant Violet 421                                  | BD Biosciences           | IA6-2      |
| IgD                       | Brilliant Violet 711                                  | BD Biosciences           | IA6-2      |
| IgD                       | PE-CF594                                              | BD Biosciences           | IA6-2      |
| IgM                       | Brilliant Violet 605                                  | BioLegend                | MHM88      |
| IgM                       | Brilliant Violet 510                                  | BD Biosciences           | G20-127    |
| IgG                       | Brilliant Violet 605                                  | BD Biosciences           | G18-145    |
| IgG                       | APC-H7                                                | BD Biosciences           | G18-145    |
| IgA                       | APC                                                   | Miltenyi                 | IS11-8E10  |
| IgA                       | PE                                                    | Miltenyi                 | IS11-8E10  |
| Ki67                      | Alexa Fluor 488                                       | BD Biosciences           | B56        |
| CD22                      | APC                                                   | BD Biosciences           | HIB22      |
| CD79b                     | PE                                                    | BD Biosciences           | CB3-1      |
| TOSO (F <sub>c</sub> μ-R) | Brilliant Violet 421                                  | BD Biosciences           | HM14-1     |
| pY759 -PLCy2              | Alexa 488                                             | BD Biosciences           | K86-689.37 |
| pY84-BLNK                 | PE                                                    | BD Biosciences           | J117-1278  |
| Live Dead Aqua            |                                                       | Thermo Fisher Scientific |            |
| Zombie Violet             |                                                       | BioLegend                |            |
| Sytox Blue                |                                                       | Thermo Fisher Scientific |            |

**Table S7. Primers.**

| <b>NGS Primers</b>         |                                                                |
|----------------------------|----------------------------------------------------------------|
| <b>dsDNA Primers</b>       |                                                                |
| L_VH1*-r                   | CTCGGAGATGTGTATAAGAGACAGNNNNNNNNNNNNNNNNNNCAACTACAGGTGCCCACTCC |
| L_VH1-46-r                 | CTCGGAGATGTGTATAAGAGACAGNNNNNNNNNNNNNNNNNTAGCTCCAGGTGCTCACTCC  |
| L_VH1-69-r                 | CTCGGAGATGTGTATAAGAGACAGNNNNNNNNNNNNNNNNNCAGCYACAGGTGTCCASTCC  |
| L_VH1-2-r                  | CTCGGAGATGTGTATAAGAGACAGNNNNNNNNNNNNNNNNNCMACAGGWGCCCACTCC     |
| L_VH1-45-r                 | CTCGGAGATGTGTATAAGAGACAGNNNNNNNNNNNNNNNNNAGCCACAGATGCCTACTCC   |
| L_VH1-24-r                 | CTCGGAGATGTGTATAAGAGACAGNNNNNNNNNNNNNNNNNCTACAGGCACCCACGCC     |
| L_VH2-r                    | CTCGGAGATGTGTATAAGAGACAGNNNNNNNNNNNNNNNNNCCKTCCTGGGTCTTRTCC    |
| L_VH2-70*09-r              | CTCGGAGATGTGTATAAGAGACAGNNNNNNNNNNNNNNNNNCCTTCATGGGTCTTGCT     |
| L_VH3*-r                   | CTCGGAGATGTGTATAAGAGACAGNNNNNNNNNNNNNNNNNTTWAAGGTGTCCAGTGTGARG |
| L_VH3-30/33/11-r           | CTCGGAGATGTGTATAAGAGACAGNNNNNNNNNNNNNNNNNWTAARAGGTGTCCAGTGTGAG |
| L_VH4-r                    | CTCGGAGATGTGTATAAGAGACAGNNNNNNNNNNNNNNNNNCCAGATGGGTCTGYCC      |
| L_VH5-51-r                 | CTCGGAGATGTGTATAAGAGACAGNNNNNNNNNNNNNNNNNTTCTCAAGGAGTGTGKCC    |
| L_VH6-1-r                  | CTCGGAGATGTGTATAAGAGACAGNNNNNNNNNNNNNNNNNCCATGGGGTGTCTGTCA     |
| <b>PCR1 primers</b>        |                                                                |
| Forward primer             |                                                                |
| IL-R2                      | GTCTCGTGGGCTCGGAGATGTGTATAAGAGACAG                             |
| Reverse primers            |                                                                |
| CHM-2DW                    | CAGGAGACGAGGGGGAAAAGG                                          |
| CHA-2DW                    | GGAAGAAGCCCTGGACCAGGC                                          |
| CHG-D1                     | TTCGGGGAAGTAGTCCTTG                                            |
| CHD-n1                     | TATCAAGCATGCCAGGACCAC                                          |
| <b>PCR2 primers</b>        |                                                                |
| Reverse primers            |                                                                |
| HCA-n2p_ILr                | TCGTCCGCGAGCGTCAGATGTGTATAAGAGACAGGCGATGACCACGTTCCCATCT        |
| HCGn2p_ILr                 | TCGTCCGCGAGCGTCAGATGTGTATAAGAGACAGGAAGTAGTCCTTGACCAGGCA        |
| HCM-n2m_ILr                | TCGTCCGCGAGCGTCAGATGTGTATAAGAGACAGAAAGGGTTGGGGCGGATGC          |
| HCD-n2m_ILr                | TCGTCCGCGAGCGTCAGATGTGTATAAGAGACAGGGGGAACACATCCGGAGCCT         |
| <b>Single cell primers</b> |                                                                |
| Cy CH1                     | GGAAGGTGTGCACGCCGCTGGTC                                        |
| L-VH mix:                  |                                                                |
| L-VH1                      | ACAGGTGCCCACTCCCAGGTGCAG                                       |
| L-VH 3                     | AAGGTGTCCAGTGTGARGTGCAG                                        |
| L-VH 4/6                   | CCCAGATGGGTCTGTCCCAGGTGCAG                                     |
| L-VH 5                     | CAAGGAGTCTGTTCCGAGGTGCAG                                       |
| 5' AgeI VH mix :           |                                                                |
| 5' AgeIVH 1/5              | CTGCAACCGGTGTACATTCCGAGGTGCAGCTGGTGCAG                         |
| 5' AgeIVH 3                | CTGCAACCGGTGTACATTCTGAGGTGCAGCTGGTGGAG                         |
| 5' AgeIVH 4                | CTGCAACCGGTGTACATTCCCAGGTGCAGCTGCAGGAG                         |
| 5' AgeIVH 6-1              | CTGCAACCGGTGTACATTCCCAGGTACAGCTGCAGCAG                         |
| 3' SalI JH mix :           |                                                                |
| 3' SalI JH 1/2/4/5         | TGCGAAGTCGACGCTGAGGAGACGGTGACCAG                               |
| 3' SalI JH 3               | TGCGAAGTCGACGCTGAAGAGACGGTGACCATTG                             |
| 3' SalI JH 6               | TGCGAAGTCGACGCTGAGGAGACGGTGACCCTG                              |
